1 **The tomato yellow leaf curl virus C4 protein alters the expression of plant**  
2 **developmental genes correlating to leaf upward cupping phenotype in tomato**

3

4 **Chellappan Padmanabhan<sup>1,#a</sup>, Yi Zheng<sup>2</sup>, Md Shamimuzzaman<sup>1</sup>, Jennifer R. Wilson<sup>1,#b</sup>,**  
5 **Zhangjun Fei<sup>2,3</sup> and Kai-Shu Ling<sup>1\*</sup>**

6

7 <sup>1</sup>U.S. Department of Agriculture - Agricultural Research Service, U.S. Vegetable Laboratory,  
8 Charleston, SC, USA

9 <sup>2</sup>Boyce Thompson Institute, Cornell University, Ithaca, NY, USA

10 <sup>3</sup>U.S. Department of Agriculture - Agricultural Research Service, Robert W. Holley Center for  
11 Agriculture and Health, Ithaca, NY, USA

12

13 <sup>#a</sup> Current address: U.S. Department of Agriculture, Animal and Plant Health Inspection Service, Plant  
14 Protection and Quarantine, Science and Technology, Plant Pathogen Confirmatory Diagnostics  
15 Laboratory, Laurel, MD, USA

16 <sup>#b</sup> Current address: U.S. Department of Agriculture – Agricultural Research Service, Corn, Soybean and  
17 Wheat Quality Research Unit, Wooster, OH, USA

18

19 **\* Correspondence:**

20 Email: [kai.ling@usda.gov](mailto:kai.ling@usda.gov) (KSL)

21

22 **Short title: The tomato yellow leaf curl virus C4 protein induces symptom expression in tomato**

23

24 **Key Words:** Begomovirus, C4-protein. Geminivirus, Tomato yellow leaf curl virus, RNA-Seq,  
25 Transcriptome, Transcription factors,

26

27 **Abstract**

28 *Tomato yellow leaf curl virus* (TYLCV), a monopartite begomovirus in the family *Geminiviridae*, is  
29 efficiently transmitted by the whitefly, *Bemisia tabaci*, and causes serious economic losses to tomato  
30 crops around the world. TYLCV-infected tomato plants develop distinctive symptoms of yellowing and  
31 leaf upper cupping. In recent years, excellent progress has been made in the characterization of  
32 TYLCV C4 protein function as a pathogenetic determinant in experimental plants, including *Nicotiana*  
33 *benthamiana* and *Arabidopsis thaliana*. However, molecular mechanism leading to disease symptom  
34 development in natural host plant tomato has yet to be characterized. The aim of the current study was  
35 to generate transgenic tomato plants expressing the TYLCV *C4* gene and evaluate differential gene  
36 expression through comparative transcriptome analysis between the transgenic *C4* plants and the  
37 transgenic green fluorescent protein (*Gfp*) gene control plants. Transgenic tomato plants expressing the  
38 TYLCV *C4* developed phenotypes, including leaf upward cupping and yellowing that are similar the  
39 disease symptom expressed on tomato plants infected with TYLCV. In a total of 241 differentially  
40 expressed genes identified in the transcriptome analysis, a series of plant development-related genes,  
41 including transcription factors, glutaredoxins, protein kinases, R-genes and microRNA target genes,  
42 were significantly altered. These results provide further evidence to support the important function of  
43 the *C4* protein in begomovirus pathogenicity. These transgenic tomato plants could serve as basic  
44 genetic materials for further characterization of plant receptors that are interacting with the TYLCV  
45 *C4*.

46

47 **1. Introduction**

48

49 Tomato (*Solanum lycopersicum* L.) is one of the most economically important and widely grown  
50 vegetable crops in the world. Viral diseases are a major factor limiting tomato production. Tomato  
51 yellow leaf curl virus (TYLCV), a whitefly (*Bemisia tabaci*)-transmitted begomovirus, has caused  
52 serious economic losses to tomato productions worldwide [1, 2]. TYLCV, in the genus *Begomovirus*  
53 and the family *Geminiviridae*, has a monopartite genome of a single-stranded circular DNA molecule  
54 of ~2.8 kb in size. The TYLCV genome contains six open reading frames (ORFs), including two ORFs  
55 in virion (V) sense orientation, *V1* and *V2*, encoding coat protein and pre-coat, respectively, and four  
56 ORFs in complementary (C) orientation, *C1*, *C2*, *C3* and *C4*, encoding proteins responsible for virus  
57 replication, trans-activation, accumulation and induction of symptoms, respectively. Furthermore, three  
58 geminivirus-encoded proteins, *C2*, *C4* and *V2*, also play a role in RNA-silencing suppression [3].

59 TYLCV-encoded *C4* is embedded within a larger ORF, *C1*, in a different reading frame. *C4* is a  
60 relatively conserved protein which may display diverse biological functions in monopartite and  
61 bipartite geminiviruses. In monopartite begomoviruses, expression of tomato leaf curl virus (TLCV) *C4*  
62 showed virus-like symptoms in transgenic tobacco and tomato plants [4]. The *C4* protein of tomato leaf  
63 curl Yunnan virus (TLCYnV) induced severe developmental abnormalities in *Nicotiana benthamiana*  
64 [5] and great progress has been achieved to identify several host factors that are interacting with the  
65 TLCYnV *C4* [6, 7, 8, 9].

66 There are likely multi-functional roles for the TYLCV *C4* that would need to be further  
67 explored [10, 11, 12]. It has been shown that the TYLCV *C4* protein interacts with the BARELY ANY  
68 MERISTEM 1 (BAM1) and suppresses the cell-to-cell movement of RNAi signals [13] and  
69 chloroplast-dependent anti-viral salicylic acid (SA) biosynthesis in *Arabidopsis* [14] Another study in  
70 *Arabidopsis* demonstrated that the TYLCV *C4* protein interacted broadly with plant receptor-like  
71 kinases [15] It has been suggested that due to its interaction with CLV1, *C4* inhibits the cooperative

72 interaction between CLV1 and WUSCHEL, affecting their function in maintenance of stem cells in  
73 shoot meristems, resulting in the leaf curl-like symptoms [16]. These recent development in TYLCV  
74 C4 functional studies in model plant species are very encouraging and we were aiming in  
75 characterizing the TYLCV C4 function in natural host plant tomato.

76 In the present study, transgenic tomato plants expressing TYLCV C4 gene developed plant  
77 stunting, leaf upward cupping and yellowing phenotypes that are resembling those disease symptoms in  
78 tomato plants infected by TYLCV. To characterize what types of genes and metabolic pathways that  
79 are affected by expressing TYLCV C4 gene in transgenic tomato plants, we conducted comparative  
80 transcriptome analysis and identified a series of genes encoding for transcription factors, glutaredoxins,  
81 protein kinases, R-genes and microRNAs were significantly altered.

82

## 83 **2. Results**

### 84 *2.1. Development of TYLCV C4 Expressing Transgenic Tomato Plants*

85 To develop transgenic tomato plants expressing TYLCV C4, a full sequence of the C4 gene of a  
86 TYLCV isolate from Florida, USA was synthesized and cloned into the plant expression vector  
87 PEG101 (Gateway) between the cauliflower mosaic virus (CaMV) 35S promoter and nopaline synthase  
88 (NOS) terminator. Transgenic tomato plants were generated using *Agrobacterium* (LBA4404)-  
89 mediated transformation of the tomato ‘Moneymaker,’ a cultivar that is very susceptible to TYLCV  
90 infection. We initiated an *Agrobacterium* transformation with 353 explants (leaf-discs), which resulted  
91 in 28 plantlets in the selection media, from which we recovered 18 rooted plants. Among those, two  
92 transgenic tomato lines (designated C4-C1 and C4-C5) were selected for further analysis. These T<sub>0</sub> and  
93 T<sub>1</sub> transgenic C4 plants developed phenotypes of plant stunting, upward leaf cupping and leaf  
94 yellowing, which resembled typical tomato yellow leaf curl disease symptoms on tomato plants  
95 infected by TYLCV (Figs. 1 and 2).

96

97 **Figure 1.** Development of transgenic tomato plants expressing the TYLCV *C4* gene. **A)** A schematic  
98 model for TYLCV (upper panel) showing its genome organization as a typical monopartite  
99 begomovirus and yellow leaf curl symptoms on tomato plants naturally infected by TYLCV (lower  
100 panel). **B)** A schematic model of the T-DNA region between the right border (RB) and Left border  
101 (LB) depicting the TYLCV *C4* gene under 35S promoter control and a NOS terminator (top panel)  
102 used to develop transgenic tomato plants. Aside-by-side comparison of the phenotypes (middle panel)  
103 displayed on a *Gfp*-transgenic plant (left side) and a TYLCV *C4*-transgenic tomato plant (right side). A  
104 close-up view of the yellow leaf curl disease-like phenotypes (yellowing and upward cupping leaves)  
105 displayed on a TYLCV *C4*-transgenic plant (lower panel).  
106

107

108 **Figure 2.** Biological and molecular characterization of the TYLCV *C4* gene expression on transgenic  
109 tomato plants. **A)** A control *Gfp*-transgenic plant with normal phenotypes in plant growth and fruit  
110 development. **B)** Transgenic tomato plants expressing TYLCV *C4* gene developed upward leaf cupping  
111 phenotypes resembling TYLCV infection on tomato, the T<sub>0</sub> line ‘C4-C1’ (with a close-up view on a  
112 leaflet) was able to generate fruits, albeit of a smaller size, which allowed us to evaluate plants in the T<sub>1</sub>  
113 plants. **C)** Another independent line ‘C4-C5’ expressed a similar leaf curl phenotype but bearing no  
114 fruit. **D)** Molecular characterization of the transgene *C4* expression in transgenic tomato plants using  
115 their respective DNA preparations with gene-specific primers (top panel) in polymerase chain reaction  
116 (PCR) (left panel) or RNA preparations by reverse transcription PCR (RT-PCR) (right panel). Two  
117 TYLCV *C4*-transgenic tomato plants (C4-C1 and C4-C5) along with a control *Gfp*-transgenic plant  
118 (GFP) were used. “+” and “-” were plasmid DNA with or without TYLCV *C4* sequence, respectively.  
119 In the bottom panels, an endogenous host gene “Actin” was used as internal quality control for DNA or  
120 RNA preparations used for their respective reactions.  
121

122

123 The two transgenic lines induced similar phenotypes, with upward leaf cupping and plant  
124 stunting, while producing smaller size of fruits (line ‘C4-C1’) or no fruit (line ‘C4-C5’) (Fig. 2). In  
125 contrast, similarly generated control transgenic *Gfp* plants presented with normal phenotype (Fig. 2).  
126 The insertion of the transgenes *C4* or *Gfp* in those transgenic plants was validated using polymerase  
127 chain reaction (PCR) and their expression was confirmed via reverse-transcriptase (RT)-PCR with their  
128 respective gene-specific primers (Fig. 2; Supplementary Fig. S1). These analyses demonstrated that the  
129 transgenic *C4* plants with the yellow leaf curl disease-like phenotype contained and expressed the  
130 expected TYLCV *C4* transgene. Observation of disease-like phenotype in the stable transgenic tomato

131 plants offered a golden opportunity to unravel the function of the TYLCV *C4* gene. To characterize  
132 inheritance of the disease-like phenotype in the T<sub>1</sub> transgenic plants, we observed a segregation of leaf  
133 curl-like phenotype in the T<sub>1</sub> seedlings generated from the transgenic tomato plants expressing TYLCV  
134 *C4*. RT-PCR tests confirmed the presence of transgene expression in those T<sub>1</sub> plants exhibiting plant  
135 stunting and leaf upward cupping phenotype. On the other hand, the control transgenic tomato plants  
136 expressing the green fluorescent protein (*Gfp*) gene exhibited a normal appearance phenotype as those  
137 of non-transgenic plants (Fig. 1).

138

## 139 2.2. Comparative Transcriptome Analysis of Transgenic *C4* and Green Fluorescent Protein (*Gfp*)

### 140 Control Plants

141 To understand the underlying molecular mechanism leading to the yellow leaf curl disease-like  
142 phenotype in the transgenic *C4* plants, we conducted a comparative transcriptome profile analysis to  
143 identify differentially expressed genes between *C4* transgenic plants and the control *Gfp* transgenic  
144 plants. Among them, three individual T<sub>1</sub> transgenic plants from the ‘C4-C1’ line and three transgenic  
145 tomato plants expressing the *Gfp* at the same growth stage under the same environmental conditions in  
146 the same greenhouse were selected for transcriptome analysis. Overall, an average of ~21.5 million raw  
147 reads per library were generated. After adapter trimming and removal of low-quality reads and rRNA  
148 sequences, an average of ~17.1 million high quality clean reads were obtained, with ~15.9 million of  
149 those reads mapping to the tomato genome (version SL3.0) (Supplementary Table S1). Values of  
150 Pearson’s correlation coefficients for all biological replicates were high, suggesting highly reproducible  
151 data generated by RNA-Seq (Supplementary Table S2).

152 Among these RNA-seq libraries, a high number of reads were mapped to the target transgenes,  
153 105 to 285 reads to the TYLCV *C4* and 10,834 to 20,311 reads to the *Gfp* (Table 1). We also observed  
154 a similar trend when using normalized expression of the *C4* and *Gfp* transgenes in RPKM (Reads Per

155 Million Per Kilobase Mapped Reads) (Table 1). This provided further evidence supporting the  
156 expression of the target transgenes in their respective transgenic plants, which laid a foundation for a  
157 comprehensive analysis of global gene expression in transgenic tomato plants to examine their  
158 responses in association with expression of a disease-like phenotype in the *C4* transgenic plants.

159

160 **Table 1.** Transgene expression analysis of RNA-seq reads mapped to the *C4* or *Gfp* transgene

| Library | Genome Mapped Reads (Million) | Transgene Length (Kb) | Transgene Read Counts | Normalized Transgene Expression (RPKM) <sup>a</sup> |
|---------|-------------------------------|-----------------------|-----------------------|-----------------------------------------------------|
| C4-C1-1 | 15.51                         | 0.298                 | 105                   | 22.72                                               |
| C4-C1-2 | 24.98                         | 0.298                 | 285                   | 38.29                                               |
| C4-C1-3 | 15.87                         | 0.298                 | 131                   | 27.70                                               |
| GFP1-1  | 11.78                         | 0.721                 | 10834                 | 1275.58                                             |
| GFP1-2  | 15.9                          | 0.721                 | 20311                 | 1771.74                                             |
| GFP1-3  | 11.82                         | 0.721                 | 12145                 | 1425.10                                             |

161 <sup>a</sup>Reads were normalized in RPKM (Reads Per Million Per Kilobase Mapped Reads). Number of reads  
162 were divided by length of transgene in kilobases and total number of genome mapped reads in millions.  
163

164 We identified a total of 241 differentially expressed genes (DEGs) (Supplementary Dataset S1),  
165 with 152 upregulated (Supplementary Dataset S2) and 89 down-regulated (Supplementary Dataset S3)  
166 in the transgenic *C4* plants compared to the transgenic *Gfp* plants (Fig. 3A). A pathway analysis of all  
167 DEGs showed that 126 pathways were altered (Supplementary Dataset S4). Gene Ontology (GO) term  
168 enrichment analysis revealed that 13 different functional categories were enriched in the DEGs (Fig.  
169 3B), with glutaredoxin activity, arsenate reductase activity and cell redox homeostasis being the top  
170 three categories. Among 152 up-regulated genes, the most prominent annotation group was  
171 glutaredoxins. Among 89 down-regulated genes, the most prominent annotation group was receptor-  
172 like protein kinases (Table 2).

173

174

175 **Figure 3.** Comparative transcriptome analysis on differential gene expression between the TYLCV *C4*-  
176 transgenic tomato plants and those control transgenic plants expressing the *Gfp* gene under the same  
177 genetic background. **A)** A volcano plot showed a distribution pattern of differentially expressed genes

178 (DEGs) with number of up-regulated (in green) or down-regulated (in red) genes in the *C4*-transgenic  
179 tomato plants over that of the *Gfp*-transgenic plants. X-axis represents  $-\log_{10}$  (p-value) and y-axis  
180 represents  $\log_2$  (fold change). Black horizontal dotted lines show the p-value cut off at 0.05. Black  
181 vertical dotted lines were drawn using  $\log_2$  (fold change) cut off at -1.5 and 1.5. **B)** Gene Ontology  
182 (GO) enrichment analysis revealed 13 enriched categories of the identified DEGs, with category in the  
183 y-axis and  $-\log_{10}$  (p-value) in the x-axis.

184  
185  
186  
187

**Table 2.** Classification of differentially expressed genes to prominent annotation groups

| <b>Up-regulated Genes Annotation Group</b>     | <b>Number of Genes (152)</b> |
|------------------------------------------------|------------------------------|
| Glutaredoxin                                   | 12                           |
| Avr9/Cf-9 rapidly elicited protein             | 3                            |
| Cytochrome P450                                | 3                            |
| Late embryogenesis abundant family protein     | 3                            |
| MADS box transcription factor                  | 3                            |
| MYB transcription factor                       | 3                            |
| Plant-specific domain TIGR01589 family protein | 3                            |
| WRKY transcription factor                      | 3                            |
| Unknown Protein                                | 30                           |
| Others                                         | 89                           |
|                                                |                              |
| <b>Down-regulated Genes Annotation Group</b>   | <b>Number of Genes (89)</b>  |
| Receptor like protein kinase                   | 4                            |
| Xyloglucan endotransglucosylase/hydrolase      | 3                            |
| Cytochrome P450                                | 3                            |
| bZIP/bHLH transcription factor                 | 3                            |
| Unknown Protein                                | 5                            |
| Others                                         | 71                           |

188

### 189 2.3. *Characterization of Selected Differentially Expressed Genes*

190 Further classification placed DEGs into different regulatory groups such as transcription factors,  
191 protein kinases, R-genes, and microRNA target genes. From the GO enrichment analysis, we  
192 determined that the oxidoreductase activity of glutaredoxin (GRX) was one of the most highly enriched  
193 categories of DEGs (Fig. 3B). GRXs allow for redox regulation of protein activity by reversibly  
194 glutathionylating or reducing disulfide bridges in their targets and plant developmental function (Table



195 3). Twelve glutaredoxin genes were differentially expressed and all of them were induced in the *C4*  
 196 transgenic plants (Table 3).

197

198 **Table 3.** Glutaredoxin genes differentially expressed between the transgenic *C4* plants and the  
 199 transgenic *Gfp* control plants

| Gene ID        | Annotation   | log2fold | Adjusted P-value | General Functions                                                                                                                                                                                                               |
|----------------|--------------|----------|------------------|---------------------------------------------------------------------------------------------------------------------------------------------------------------------------------------------------------------------------------|
| Solyc05g051720 | Glutaredoxin | 7.99     | 0.008            | Flower development,<br>Salicylic acid signaling,<br>Oxidative stress,<br>Petal development,<br>Anther development,<br>Floral organ primordium<br>formation,<br>Root development,<br>Dwarf phenotype, and<br>Embryo development. |
| Solyc04g011860 | Glutaredoxin | 4.38     | 0.0183           |                                                                                                                                                                                                                                 |
| Solyc04g011880 | Glutaredoxin | 1.63     | 0.0163           |                                                                                                                                                                                                                                 |
| Solyc01g067440 | Glutaredoxin | 2.75     | 1.05E-09         |                                                                                                                                                                                                                                 |
| Solyc04g011840 | Glutaredoxin | 7.62     | 0.0192           |                                                                                                                                                                                                                                 |
| Solyc05g051730 | Glutaredoxin | 3.68     | 0.0009           |                                                                                                                                                                                                                                 |
| Solyc04g053110 | Glutaredoxin | 3.27     | 0.0007           |                                                                                                                                                                                                                                 |
| Solyc04g011800 | Glutaredoxin | 3.12     | 0.0293           |                                                                                                                                                                                                                                 |
| Solyc04g011830 | Glutaredoxin | 4.6      | 0.0011           |                                                                                                                                                                                                                                 |
| Solyc06g054570 | Glutaredoxin | 4.23     | 1.66E-08         |                                                                                                                                                                                                                                 |
| Solyc01g067460 | Glutaredoxin | 1.95     | 6.83E-07         |                                                                                                                                                                                                                                 |
| Solyc09g074590 | Glutaredoxin | 2.18     | 0.0478           |                                                                                                                                                                                                                                 |

200

201 On the other hand, a total of 18 transcription factor (TF) genes belonging to eight different  
 202 families exhibited differential expression patterns between the transgenic *C4* plants and the control *Gfp*  
 203 transgenic plants, among which 14 were up-regulated while four were down-regulated in the *C4*  
 204 transgenic plants (Table 4). The 14 up-regulated TFs included one basic helix-loop-helix (bHLH), two  
 205 HD-ZIP, three MADS box, three MYB, one NAM/NAC, three WRKY and one LOB TF gene. On the  
 206 other hand, one bHLH, two bZIP and one MYB TF gene were down-regulated.

207

208 **Table 4.** Differentially expressed genes representing transcription factors between transgenic *C4* plants  
 209 and the *Gfp* control plants

| Gene ID            | Annotation                | Function                       | log2fold | Adj P-val |
|--------------------|---------------------------|--------------------------------|----------|-----------|
| <b>bHLH Family</b> |                           |                                |          |           |
| Solyc02g091690     | bHLH transcription factor | Erect leaf phenotype dwarfism  | -2.4     | 7.00E-06  |
| Solyc03g006910     | bHLH transcription factor | Erect leaf phenotype dwarfism  | 3.27     | 0.0015    |
| <b>bZIP Family</b> |                           |                                |          |           |
| Solyc07g053450     | bZIP transcription factor | Leaf cell number and cell size | -2.06    | 0.0307    |
| Solyc12g010800     | bZIP transcription factor | Leaf cell number and cell size | -1.64    | 6.00E-09  |

| <b>HD-ZIP Family</b> |                                 |                                        |       |          |
|----------------------|---------------------------------|----------------------------------------|-------|----------|
| Solyc01g096320       | HD-ZIP transcription factor     | Adaxialized leaf (upward leaf cupping) | 3.1   | 5.16E-28 |
| Solyc06g053220       | HD-ZIP transcription factor     | Adaxialized leaf (upward leaf cupping) | 2.2   | 0.0288   |
| <b>LOB Family</b>    |                                 |                                        |       |          |
| Solyc04g077990       | LOB domain transcription factor | Leaf primordia development             | 1.62  | 0.0061   |
| <b>MADS Family</b>   |                                 |                                        |       |          |
| Solyc02g065730       | MADS box transcription factor   | Leaf morphogenesis                     | 1.73  | 4.49E-08 |
| Solyc05g056620       | MADS box transcription factor   | Leaf morphogenesis                     | 2.37  | 0.0003   |
| Solyc02g071730       | MADS-box transcription factor   | Leaf morphogenesis                     | 2.59  | 0.0003   |
| <b>MYB Family</b>    |                                 |                                        |       |          |
| Solyc01g010910       | MYB transcription factor        | Maintenance of leaf morphogenesis      | -1.51 | 0.007    |
| Solyc05g008250       | MYB transcription factor        | Maintenance of leaf morphogenesis      | 1.79  | 0.048    |
| Solyc11g073120       | MYB transcription factor        | Maintenance of leaf morphogenesis      | 1.55  | 0.0001   |
| Solyc01g109670       | MYB transcription factor        | Maintenance of leaf morphogenesis      | 4.18  | 2.00E-10 |
| <b>NAM Family</b>    |                                 |                                        |       |          |
| Solyc12g013620       | NAM/NAC transcription factor    | Specification of leaflet boundaries    | 1.77  | 0.0001   |
| <b>WRKY Family</b>   |                                 |                                        |       |          |
| Solyc08g062490       | WRKY transcription factor       | Flag leaf growth and host defense      | 1.78  | 0.0119   |
| Solyc03g116890       | WRKY transcription factor       | Flag leaf growth and host defense      | 2.05  | 0.0203   |
| Solyc09g014990       | WRKY-like transcription factor  | Flag leaf growth and host defense      | 2.05  | 0.0025   |

210

211 A total of seven DEGs coding for protein kinases were identified in the RNA-seq dataset,  
 212 among which three were induced and four suppressed in the transgenic *C4* plants (Table 5).  
 213 Specifically, a CBL-interacting protein kinase, a calcium-dependent protein kinase and an LRR  
 214 receptor-like serine/threonine-protein kinase were induced by 1.5 to 2.4 log<sub>2</sub>fold. On the other hand,  
 215 expression of four other protein kinase genes in the families of RLK-Pelle\_LRR-XI-1, RLK-  
 216 Pelle\_PERK-2, RLK-Pelle\_RLCK-VIIa-1 and RLK, were suppressed in the *C4* transgenic plants  
 217 (Table 5).

218

219 **Table 5.** Differentially expressed genes in protein kinase families between the transgenic *C4* plants and  
220 the control *Gfp* plants

| Gene_ID        | Annotation                           | Family                | log2fold | Adj P-value |
|----------------|--------------------------------------|-----------------------|----------|-------------|
| Solyc08g067310 | CBL-interacting protein kinase 6     | CAMK_CAMKL-CHK1       | 2.25     | 0.0255      |
| Solyc12g099790 | Calcium-dependent protein kinase 17  | CAMK_CDPK             | 1.51     | 0.0008      |
| Solyc05g007230 | Receptor like kinase, RLK            | RLK-Pelle_LRR-XI-1    | -2.83    | 0.0255      |
| Solyc04g079690 | Receptor-like protein kinase 2       | RLK-Pelle_PERK-2      | -1.64    | 0.0268      |
| Solyc10g084390 | Receptor protein kinase-like protein | RLK-Pelle_RLCK-VIIa-1 | -1.88    | 0.02693     |
| Solyc11g016930 | LRR receptor serine/threonine kinase | RLP                   | 2.38     | 0.00001     |
| Solyc09g015840 | Receptor-like kinase                 | RLK                   | -1.51    | 0.01957     |

221

222 In addition, one gene encoding gibberellin 2-beta-dioxygenase 7 in the gibberellin (GA)  
223 biosynthesis pathway was induced by more than 2 log2fold in transgenic *C4* plants (Supplementary  
224 dataset S2). Furthermore, we identified two un-annotated microRNAs (M00148 and M00188),  
225 targeting the same gene Solyc10g007080, which encodes an Aberrant lateral root formation 5 protein,  
226 resulting in down-regulated expression (-2.94) in the transgenic *C4* plants (Supplementary dataset S3).  
227 Two different microRNAs regulating the expression of the same host gene (Solyc10g007080) is an  
228 important discovery, although their functions in regulating aberrant lateral root formation and its causal  
229 effect on plant stunting would need further study.

230

231 *2.4. Validation of gene expression using quantitative reverse transcription PCR (qRT-PCR)*

232 Differential expression of 14 randomly selected DEGs from the transcriptome study were validated by  
233 qRT-PCR. All genes tested by qRT-PCR were in full agreement with the expression pattern  
234 (upregulation or downregulation) observed in the RNA-seq dataset (Table 6). For all but one of these  
235 genes (Solyc11g073120), the differential expression observed via qRT-PCR was also statistically  
236 significant ( $p < 0.05$ ).

237

238

239

240 **Table 6.** Summary of qRT-PCR validation of selected differentially expressed genes

241

| Gene ID            | Annotation                       | RNA-seq  |          | qRT_PCR  |             |
|--------------------|----------------------------------|----------|----------|----------|-------------|
|                    |                                  | log2fold | P-value  | log2fold | Adj P-value |
| Solyc04g011880     | Glutaredoxin                     | 1.63     | 0.0163   | 0.54     | 8.82E-06    |
| Solyc06g054570     | Glutaredoxin                     | 4.23     | 1.66E-08 | 2.44     | 1.01E-07    |
| Solyc01g067460     | Glutaredoxin                     | 1.95     | 6.83E-07 | 1.22     | 1.44E-05    |
| Solyc02g091690     | bHLH transcription factor        | -2.40    | 7.00E-06 | -2.30    | 0.0052      |
| Solyc07g053450     | bZIP transcription factor        | -2.06    | 0.0307   | -1.26    | 0.0354      |
| Solyc01g096320     | HD-ZIP transcription factor      | 3.10     | 5.16E-28 | 0.90     | 0.0145      |
| Solyc02g071730     | MADS box transcription factor    | 2.59     | 0.0030   | 2.79     | 7.67E-06    |
| Solyc03g116890     | WRKY transcription factor        | 2.05     | 0.0203   | 1.18     | 0.0083      |
| Solyc01g010910     | MYB transcription factor         | -1.51    | 0.0073   | -2.83    | 3.10E-09    |
| Solyc11g073120     | MYB transcription factor         | 1.55     | 1.52E-04 | 0.23     | 0.1895      |
| Solyc05g007230     | Receptor-like kinase, RLK        | -2.83    | 0.0255   | -1.22    | 0.0064      |
| Solyc09g014990.2.1 | WRKY-like transcription factor   | -0.44    | 0.8536   | 2.05     | 0.0025      |
| Solyc03g006910.2.1 | bHLH transcription factor        | -0.18    | 0.6571   | 3.27     | 0.0015      |
| Solyc08g067310.1.1 | CBL-interaction protein kinase 6 | -0.11    | 0.4041   | 2.25     | 0.0255      |

242

### 243 3. Discussion

244 Using stable transformed tomato plants and comparative transcriptome analysis, we were able to profile  
 245 the global effects on gene expression in transgenic tomato plants expressing the TYLCV *C4* gene in  
 246 comparison to the same genetic background tomato plants transformed with the *Gfp* gene. Transgenic  
 247 tomato plants expressing TYLCV *C4* developed plant stunting, upward leaf cupping, and small fruit  
 248 size phenotypes that resemble the yellow leaf curl disease symptoms on tomato plants naturally  
 249 infected with TYLCV. Through comprehensive transcriptome profile analysis between the *C4*  
 250 transgenic plants and the control *Gfp* transgenic plants, we identified a total of 241 differentially  
 251 expressed genes (152 up-regulated and 89 down-regulated) using robust statistical analysis on three  
 252 biologically replicated RNA-Seq with a stringent cutoff [adjusted p values < 0.05 and log<sub>2</sub>(fold  
 253 change) ≥ 1.5]. We believe that these DEG analyses are highly reliable as the validation test on selected  
 254 14 genes using qRT-PCR agreed with the expression pattern generated in RNA-seq datasets used for

255 transcriptome analysis. Our results are in agreement with several other studies which have also  
256 demonstrated the high correlation between RNA-Seq and qRT-PCR [17, 18].

257       Among the differentially expressed genes (DEGs) identified in our study are a series of  
258 glutaredoxins, protein kinases, transcriptions factors, and microRNAs target genes that are potentially  
259 involved in leaf tissue formation and plant development that could potentially contribute to the yellow  
260 leaf curl disease-like symptom development in transgenic tomato plants expressing the TYLCV *C4*.  
261 The result from the present study offers another evidence to support the *C4* as a pathogenicity  
262 determinant for TYLCV, one of the most important tomato viruses. Although several studies have  
263 demonstrated that the *C4* protein of geminiviruses is responsible for developing disease-like symptoms  
264 in tobacco, tomato, and *N. benthamiana* [4, 5]. The *C4* protein has also been shown to be the  
265 pathogenicity determinant for numerous viruses in the *Geminiviridae* [4, 19, 20, 21]. Its function in  
266 TYLCV has received great attention in recent years using model plants, *Arabidopsis* and *N.*  
267 *benthamiana* in their studies [12, 14, 18, 22,]. Previously, Rojas and colleagues showed that TYLCV  
268 *C4* is localized to the cell periphery, thus suggesting it may be involved in mediating virus cell-to-cell  
269 movement [23]. However, as the *C4* gene is totally embedded inside the *C1* open reading frame in  
270 TYLCV, this cell-to-cell movement may be attributed to the *C1* protein's function as evidenced in  
271 other bipartite begomoviruses. Another study [24] suggested that the TYLCV *C4* protein is likely a  
272 pathogenicity factor due to its interaction with and suppression by a host resistance factor to restrict  
273 virus systemic movement.

274       We identified a total of seven DEGs in the protein kinase families, four of which are receptor-  
275 like kinases (in the families of RLK-Pelle\_LRR-XI-1, RLK-Pelle\_PERK-2, RLK-Pelle\_RLCK-VIIa-1, and  
276 RLK), and all are down-regulated (Table 5). Geminivirus-encoded *C4/AC4* proteins have previously  
277 been shown to interact with RLKs, including CLV1 in the CLAVATA 1 (CLV1) clade [16, 22, 25], as  
278 well as BAM1 and BAM 2 [26, 27]. The targeting of BAM1 and BAM2 by TYLCV *C4* has been

279 shown to block RNAi signal spread from cell to cell [13]. In addition to two RLKs (BAM1 and BAM2)  
280 that have previously been shown to be involved in TYLCV C4 functions [12, 13, 14, 22], our  
281 transcriptome analysis also revealed the suppression of four RLK genes in the transgenic *C4* tomato  
282 plants, indicating that the RLK-mediated plant defense system may have been compromised, leading to  
283 the development of a disease-like phenotype in the transgenic tomato plants. Thus, these four RLKs  
284 identified in the present study deserve further characterization on their functions in relationship to the  
285 TYLCV resistance and susceptibility in tomato plants.

286 We identified a total of 12 glutaredoxins (GRXs, also known as thioltransferases) that were  
287 induced in the *C4* transgenic tomato plants, with all of them being up-regulated. GRXs are small redox  
288 enzymes of approximately one hundred amino acid residues that use glutathione as a cofactor [28]. In  
289 plants, GRXs are involved in flower development and salicylic acid signaling [29], and GRXs are well-  
290 documented to be involved in oxidative stress responses [29]. Studies revealed that two members of a  
291 land plant-specific class of GRXs, ROXY1 and ROXY2, are required for petal development in  
292 *Arabidopsis* [30]. Further studies revealed that ROXY1 interacts with several TGA transcription  
293 factors, including TGA2, TGA3, TGA7, and PERIANTHIA (PAN); the function of PAN is floral organ  
294 primordium formation [31] and root development [32], thus supporting the role of GRXs in these  
295 processes. Overexpression of a rice glutaredoxin (OsGRX6), affects hormone and nitrogen status in  
296 rice plants, resulting in a dwarf phenotype [33] whereas overexpression of OsGrxC2.2 resulted in  
297 abnormal embryos and an increased grain weight in rice [34]. In our study, we observed a stunting  
298 (dwarf) phenotype in the *C4*-transgenic plants (Fig. 2), suggesting that *C4* may play a role in plant  
299 development by interfering with hormone and nitrogen status, similar to the effects of overexpressing  
300 *OsGRX6* in rice [33].

301 Expression of a series of leaf development transcription factors (TFs), including those in the  
302 bHLH, bZIP, HD-ZIP, NAC/NAM, MADS box, LOB, MYB and WRKY families, were altered in

303 the *C4*-transgenic plants (Table 4). These leaf development transcription factors could be involved in  
304 functions such as regulating leaflet boundary, leaf primordial development, leaf morphogenesis, and  
305 leaf cell number and size, which may potentially lead to the leaf upward cupping phenotype.

306 The bHLH transcription factors, one of the largest TF super-families in plants, can participate in  
307 a broad range of growth and developmental signaling pathways. In the transgenic *C4* plants, two bHLH  
308 TFs were differentially expressed: one induced and another suppressed. Plant bHLH proteins have the  
309 potential to be involved in regulating a multiplicity of transcriptional programs. Experimental evidence  
310 reveals that bHLH genes make a significant contribution to the specification of stomata in plants [35].  
311 On the other hand, HLH/bHLH transcription factors could have an opposite effect in mediating  
312 brassinosteroid regulation of cell elongation and plant development, and their overexpression resulted  
313 in an erect leaf phenotype in rice and dwarfism in *Arabidopsis* [36]. In another study, Ichihashi and  
314 colleagues [37] demonstrated that the bHLH transcription factor SPATULA controls final leaf size in  
315 *Arabidopsis*.

316 Next, some of the altered TF genes in the *C4*-transgenic plants belong to the bZIP family.  
317 TYLCV *C4* mediated a strong suppression of two bZIP genes, which may ultimately alter normal plant  
318 development, resulting in an enhanced disease-like leaf curl phenotype in the *C4*-transgenic tomato  
319 plants. bZIP TFs play crucial roles in plant development, signaling and responses to abiotic/biotic  
320 stimuli, including abscisic acid (ABA) signaling, hypoxia, drought, high salinity, cold stress, hormone  
321 signaling, light responses, osmotic stresses and pathogen defense [38, 39].

322 In contrast to the suppression of bZIP TFs, two TFs in the homodomain-leucine zipper (HD-  
323 ZIP) family were induced in the transgenic *C4* plants. [40] demonstrated that loss-of-function  
324 mutations in two HD-ZIPII transcription factors (*athb4* and *hat3*) resulted in severely abaxialized and  
325 entirely radialized leaves. Conversely, overexpression of HAT3 results in adaxialized leaf  
326 development. Our data agree with the second aforementioned study as the overexpression of two HD-

327 ZIP TFs is correlated with adaxialized leaf development (upward leaf cupping) in the transgenic *C4*  
328 tomato plants.

329 The NAC transcription factors, including NAM (no apical meristem), ATAF (Arabidopsis  
330 transcription activation factor), and CUC (cup-shaped cotyledon), have a conserved NAC domain  
331 (derived from the first letter of each gene). The transgenic *C4* tomato plants with abnormal upward leaf  
332 cupping phenotype also had an elevated expression on one of the NAC domain transcription factors.  
333 The NAC proteins are thought to be involved in developmental processes, including formation of the  
334 shoot apical meristem (SAM), floral organs, and lateral shoots [41]. Two independent studies have also  
335 provided evidence for microRNA-mediated regulation of CUC1 [42] and CUC2 [43].

336 The MADS-box transcription factors are important regulators of plant developmental pathway  
337 genes. Our study determined that expression of three MADS box TF genes were induced in the *C4*-  
338 transgenic plants, implicating their involvement in flower development. Previous studies have shown  
339 that members of the MADS-box family are known to be involved predominantly in developmental  
340 processes, including flowering time, floral meristem identity, floral organogenesis, fruit formation, seed  
341 pigmentation and endothelium development [44, 45].

342 We observed an up-regulation of one transcription factor in the LOB family. LOB TFs play  
343 important functions in maintaining lateral organ boundaries [46]. For example, the rice OsAS2 gene, a  
344 member of the LOB domain family, functions in regulating shoot differentiation and leaf development.  
345 Transgenic plants overexpressing the OsAS2 gene showed aberrant twisted leaves [47]. It is reasonable  
346 to speculate that the increased expression of LOB contributes to the development of leaf upward  
347 curling phenotype in the *C4*-transgenic tomato plants.

348 We also observed that four transcription factors in the MYB family were altered in the present  
349 study. One was suppressed, and three others induced in the transgenic *C4* plants. It is possible that  
350 alternation in the expression of these MYB genes led to the adverse effect on flower and fruit



351 production and development as observed in the transgenic *C4* tomato plants. The MYB family is a part  
352 of a large family of transcription factors found in plants and animals. The MYB TFs are regulators of  
353 many plant processes, including responses to biotic and abiotic stresses, development, differentiation,  
354 metabolism, and defense [48, 49].

355 Finally, modulated expression of three WRKY TF genes in the transgenic *C4* tomato plants may  
356 lead to suppression of the host defense to TYLCV infection. The WRKY family transcription factors  
357 are key regulators of many processes in plants, including biotic and abiotic stresses, seed dormancy and  
358 germination, and other developmental process [50, 51]. It has been reported that AtWRKY52 contains  
359 a TIR–NBS–LRR (Toll/interleukin-1 receptor–nucleotide-binding site-leucine-rich repeat) domain acts  
360 together with RPS4 to provide resistance against fungal pathogen *Colletotrichum higginsianum* and  
361 bacterial pathogen *Pseudomonas syringae* [52].

362

#### 363 4. **Conclusions**

364 A comprehensive understanding of key host genes involved in plant response to virus infection is a  
365 fundamental knowledge in developing an effective strategy for disease management. Transgenic  
366 tomato plants expressing the *C4* gene of TYLCV developed an upward leaf cupping phenotype that  
367 resembles the yellow leaf-curl disease symptoms on tomato plants infected by TYLCV, indicating  
368 importance of the *C4* protein of TYLCV (Fig. 4). Through comparative transcriptome analysis between  
369 the *C4*-transgenic plants and the control *Gfp*-transgenic plants, a series of differentially expressed genes  
370 and their regulatory networks were uncovered. In the case of *C4*-transgenic tomato plants showing a  
371 leaf upward cupping phenotype, the expression of a series of important transcription factor family  
372 genes were altered. Our analysis revealed that the *C4* protein of TYLCV interferes with the expression  
373 of several transcription pathway genes, potentially leading to the leaf upward cupping phenotype (Fig.

374 4). A basic understanding of this virus-encoded virulence factor and associated host responses on the  
375 molecular level is important for viral disease management.

376

377 **Figure 4.** A schematic flow chart depicts the potential functional interference of the TYLCV C4  
378 protein to a series of plant developmental genes, especially those involving in transcriptional  
379 regulation, protein kinase, Glutaredoxin and gene silencing pathways. The top panel shows a natural  
380 field infection of tomato plants by TYLCV through transmission by viruliferous whiteflies. The middle  
381 and lower panels showed key steps in the development of transgenic tomato plants expressing the  
382 TYLCV C4 gene, transcriptome analysis and predicted functional interference on host genes that are  
383 regulating plant development, resulting in yellow leaf curl disease-like phenotypes.  
384

385

## 386 5. Material and Methods

387

### 388 5.1. Generation of Binary TYLCV C4 Constructs

389 The C4 gene of the TYLCV isolate from Florida, USA (GenBank Accession No. AY530931.1) was  
390 synthesized by IDT (Coralville, IA). The synthetic C4 gene (C-terminus fusion) was inserted into a  
391 pENTR D TOPO vector and transformed into Top 10 chemically competent cells (Invitrogen).

392 Colonies were selected on kanamycin containing LB plates and the cloned C4 sequence was confirmed  
393 using Sanger sequencing. A positive clone was recombined with a plant expression vector, pEG101,  
394 using LR clonase (Invitrogen, USA) to insert the TYLCV C4 gene in between the CaMV 35S promoter  
395 and nopaline synthase (NOS) terminator. The sequence confirmed C4 gene in the pEG101 background  
396 was mobilized into *Agrobacterium tumefaciens* strain LBA4404 by electroporation. *Agrobacterium*  
397 colonies selected on a YM agar plate containing kanamycin and streptomycin were used for plant  
398 transformation.

399

### 400 5.2. Tomato Transformation and Confirmation

401 Tomato transformation was conducted using tomato ‘Moneymaker’ following the outlined procedures  
402 [53]. The primary transformant plants were confirmed to contain the TYLCV *C4* sequence by PCR  
403 using the following primer pair: KL14-390 C4N-1F: 5’-CACCATGGGGAACCACATCTCCAT-3’  
404 and KL14-391 C4N-1R: 5’-TTAATATATTGAGGGCCTCGGATTT-3’. As an experimental control,  
405 transgenic tomato plants with the same genetic background ‘Moneymaker’ containing the green  
406 fluorescent protein gene (*Gfp*) was previously developed [54].

407 For the control *Gfp*-transgenic plants, a confirmation test was conducted using the primer pair  
408 KL14-414 GFP-1F: 5’-CACCATGGGCAAGGGCGAGGAACT-3’ and KL14-415 GFP-1R: 5’-  
409 GGGAGTTGTAGTTGTACTCCAGCTT-3’. Transgenic tomato plants were self-pollinated and T<sub>1</sub>  
410 seeds extracted from fruits harvested from each individual line. The T<sub>1</sub> seeds were germinated on MS  
411 basal medium containing 1 mg/L Phosphinotricin, and seedlings that survived under the herbicide  
412 selection were transferred to pots containing sterile soil and maintained in a glasshouse at 28-29°C and  
413 80-90% relative humidity. Transgene insertion was confirmed by gene-specific PCR and gene  
414 expression confirmed by RT-PCR using the TYLCV *C4*- or *Gfp*- specific primers as described above.  
415 For the internal control, a pair of primers for the actin gene (forward primer KL17-071 03g078400F:  
416 5’-TTGCTGGTCGTGACCTTACT-3’ and reverse primer KL17-072 03g078400R: 5’-  
417 TGCTCCTAGCGGTTTCAAGT-3’) was used.

418

### 419 5.3. Plant RNA Extraction

420 Total RNA was extracted using 500 mg freshly collected leaf tissue from top third developed leaves of  
421 the TYLCV *C4*-transgenic tomato plants (line ‘C4-C1’) in the T<sub>1</sub> generation as well as from those *Gfp*-  
422 transgenic tomato plants as a control, which were in the same developmental stage and growing under  
423 the same greenhouse conditions. Each individual leaf tissue sample was processed in a plastic  
424 extraction bag using a HOMEX 6 homogenizer (BioReba, Switzerland) with 2.25 ml of TRIzol reagent

425 following the manufacturer's protocol (Thermo Fisher Scientific, USA). Concentration of the resulting  
426 RNA preparation was measured with a NanoDrop micro-volume spectrophotometer (Thermo Fisher  
427 Scientific, USA). The quality of cleaned DNA-free RNA preparations was checked in a 1X bleach gel  
428 [55].

429

#### 430 5.4. RNA-Seq library Preparation, Sequencing and Data Analysis

431 RNA-Seq libraries were constructed as previously described [56]. Six separate RNA-seq libraries were  
432 prepared using total RNA preparations extracted from three individual transgenic *C4* plants ( $T_1$   
433 generation) and three transgenic *Gfp* plants ( $T_1$  generation). These  $T_1$  seedlings were 21 days post  
434 germination and grown in the same greenhouse with the same environmental conditions of 28-29 °C,  
435 80-90% relative humidity, and 14 h natural sunlight. RNA-Seq libraries were sequenced on an Illumina  
436 HiSeq 2500 system to generate 100-bp single-end reads. Adapter trimming and removal of low-quality  
437 reads were performed using Trimmomatic [57]. RNA-Seq reads were filtered to remove reads aligned  
438 to the ribosomal RNA database [58] using Bowtie [59]. The resulting high-quality cleaned reads were  
439 aligned to the tomato reference genome (version SL3.0, The Tomato Genome Consortium, 2012 [60])  
440 using HISAT [61]. Reads were counted for each tomato gene model and normalized to reads per  
441 kilobase of exon model per million mapped reads (RPKM). Raw read counts were used as input to the  
442 DESeq package [62] to identify differentially expressed genes between the *C4*-transgenic and the  
443 control *Gfp*-transgenic plants. Genes with adjusted p-values less than 0.05 and log<sub>2</sub>fold changes greater  
444 than or equal to 1.5 were considered to be differentially expressed.

445 The Gene Ontology (GO) enrichment analysis of differentially expressed genes was performed  
446 using the agriGO program [63]. The Tomato Functional Genomics Database [64] and the iTAK  
447 database [65] were used for identification of tomato transcription factors, receptor-like kinases, and  
448 microRNA targets. Standalone BLAST [66] was used to identify other genes of interest by comparing

449 them with *Arabidopsis* homologs in conjunction with utilizing annotated GO terms of tomato genes  
450 [67].

451

#### 452 5.5. Validation of differentially expressed genes by qRT-PCR

453 To validate the differential gene expression as observed in the RNA-seq libraries, 14 DEGs were  
454 randomly selected for testing using qRT-PCR. Primers were designed (Supplementary Dataset S5) and  
455 their specificity confirmed by aligning the primer sequences to the tomato genome. cDNA was  
456 generated from 2  $\mu\text{g}$  of the same tomato RNA preparations as those used for RNA-seq using the  
457 SuperScript III cDNA Synthesis System (ThermoFisher Scientific, USA). Twenty-five microliter PCR  
458 reactions consisted of 2  $\mu\text{L}$  of diluted cDNA, 0.75  $\mu\text{L}$  of each primer (10  $\mu\text{M}$ ), 12.5  $\mu\text{L}$  of 2x Brilliant  
459 II SYBR Green Master Mix with low ROX (Agilent), and 9.3  $\mu\text{L}$  of nuclease-free water. PCR  
460 amplifications were performed in an Mx3005P Real-Time PCR System (Agilent, USA) using the  
461 following cycling conditions: 95°C for 10 minutes, followed by 40 cycles of 95°C for 30 seconds and  
462 60°C for 1 minute with SYBR Green detection during the 60°C step. The presence of a single amplicon  
463 in PCR reactions was confirmed by the presence of a single, uniform peak on dissociation curves  
464 conducted after amplification. Each of the selected genes was amplified from 3 biological replicates per  
465 treatment, with 3-4 technical replicates per biological replicate. Expression levels were normalized to  
466 the tomato actin gene (Solyc04g011500) using the  $\Delta\Delta\text{Ct}$  method and expressed in terms of  $\log_2$ (fold  
467 change) for comparison with the RNA-seq data. Significant differences in gene expression via qRT-  
468 PCR was determined using a one-tailed unpaired Student's *t*-test (if data are normal and  
469 homoscedastic), Welch's *t*-test (if heteroscedastic) or the Mann-Whitney Wilcoxon test (if not normally  
470 distributed). Statistical analysis was conducted in R (R Core Team 2018 [68]).

471

472

473 **Data Availability**

474 Raw RNA-Seq reads have been deposited in the NCBI SRA database under the accession

475 No. SRP266228.

476

477

478 **Author Contributions**

479 Conceptualization, K.S.L.; methodology, C.P., Y.Z., M.S., J.R.W., Z.F., K.S.L.; validation, J.R.W.;

480 formal analysis, C.P., Y.Z., M.S., J.R.W.; investigation, C.P., Y.Z., M.S., J.R.W.; Resources, K.S.L.,

481 Z.F.; data curation: C.P., Z.F., M.S. Writing-original draft preparation, C.P., K.S.L. Writing-review and

482 editing, M.S., J.R.W., Z.F.; Visualization, C.P., K.S.L.; Supervision: K.S.L.; All authors have read and

483 agreed to the published version of the manuscript.

484

485

486 **Acknowledgements**

487 We thank Andrea Gilliard, Deanna Dong, Louis William and Tyler Devaney for their excellent

488 technical assistance, and Bidisha Chanda for reviewing the manuscript.

489

490

491 **References**

492

493 1. Lefeuvre, P., Martin, D. P., Harkins, G., Lemey, P., Gray, A. J., Meredith, S., Lakay, F., Monjane,

494 A., Lett, J. M., Varsani, A., Heydarnejad, J. (2017). The spread of tomato yellow leaf curl virus

495 from the Middle East to the world. *PLoS Pathog.* **6**, e1001164.

- 496 2. Prasad, A., Sharma, N., Hari-Gowthem, G., Muthamilarasan, M., Prasad, M. (2020). Tomato  
497 yellow leaf curl virus: Impact, Challenges, and Management. *Trends in Plant Science* **25**, 897-911.
- 498 3. Glick, E., Zrachya, A., Levy, Y., Mett, A., Gidoni, D., Belausov, E., Citovsky, V., Gafni, Y. (2009).  
499 Interaction with host SGS3 is required for suppression of RNA silencing by tomato yellow leaf curl  
500 virus V2 protein. *Proc. Natl. Acad. Sci. USA*, **105**, 157-161.
- 501 4. Krake, L. R., Rezaian, M.A., Dry, I. B. (1998). Expression of the tomato leaf curl Geminivirus C4  
502 gene produces virus-like symptoms in transgenic plants. *Mol. Plant-Microbe Interact.* **11**, 413-417.
- 503 5. Xie, Y., Zhao, L., Jiao, X., Jiang, T., Gong, H., Wang, B., Briddon, R. W., Zhou, X. (2013). A  
504 recombinant begomovirus resulting from exchange of the C4 gene. *J. Gen. Virol.* **94**, 1896-1907.
- 505 6. Dogra, S. C., Eini, O., Rezaian, M. A., Randles, J.W. (2009). A novel shaggy-like kinase interacts  
506 with the tomato leaf curl virus pathogenicity determinant C4 protein. *Plant Mol. Biol.* **71**, 25-38.
- 507 7. Mei, Y., Yang, X., Huang, C, Zhang, X., Zhou, X. (2018a). Tomato leaf curl Yunnan virus-encoded  
508 C4 induces cell division through enhancing stability of Cyclin D 1.1 via impairing NbSKh-  
509 mediated phosphorylation in *Nicotiana benthamiana*. *PLoS Pathog.* **14**, e1006789.
- 510 8. Mei, Y., Wang, Y., Hu, T., Yang, X., Lozano-Duran, R., Sunter, G., Zhou, X. (2018b).  
511 Nucleocytoplasmic shuttling of geminivirus C4 protein mediated by phosphorylation and  
512 myristoylation is critical for viral pathogenicity. *Molecular Plant* **11**, 1466-1481.
- 513 9. Mei, Y., Wang, Y., Hu, T., He Z., Zhou X. (2021). The C4 protein encoded by tomato leaf curl  
514 Yunnan virus interferes with MAPK cascade-related defense responses through inhibiting the  
515 dissociation of the ERECTA/BK11 complex. *New Phytologist* <https://doi.org/10.1111/nph.17387>  
516 (last access May 2, 2021).
- 517 10. Fondong, V. N. 2019. The ever-expanding role of C4/AC4 in geminivirus infection: punching  
518 above its weight? *Molecular Plant* **12**, 145-147.

- 519 11. Luna, A. P. and Lazano-Duran, R. 2020. Geminivirus-encoded proteins: not all positional  
520 homologs are made equal. *Frontiers in Microbiology* **11**, 878.
- 521 12. Corrales-Gutierrez, M., Medina-Puche, L., Yu, Y., Wang, L., Ding, X., Luna, A., Bejarano, E. R.,  
522 Castillo, A. G., Lozano-Duran, R. (2020). The C4 protein from the geminivirus tomato yellow leaf  
523 curl virus confers drought tolerance in Arabidopsis through an ABA-independent mechanism. *Plant*  
524 *Biotechnology Journal* **18**, 1121–1123.
- 525 13. Rosas-Diaz, T., Zhang, D., Fan, P., Wang, L., Ding, X., Jiang, Y., Jimenez-Gongora, T., et al.  
526 (2018). A virus-targeted plant receptor-like kinase promotes cell-to-cell spread of RNAi. *Proc. Natl*  
527 *Acad. Sci. U S A.* **115**, 1388-1393.
- 528 14. Medina-Puche, L., Tan, H., Dogra, V., Wu, M., Rosas-Diaz., T., Wang, L., Ding, X., Zhang, D., Fu,  
529 X., Kim, C., Lozano-Duran, R. (2020). A defense pathway linking plasma membrane and  
530 chloroplasts and co-opted by pathogens. *Cell* **182**, 1109–1124.
- 531 15. Gómez, B. G., Zhang, D., Rosas-Díaz, T., Wei, Y., Macho, A. P., Lozano-Durán., R. (2019). The  
532 C4 protein of tomato yellow leaf curl virus can broadly interact with plant receptor-like kinases.  
533 *Viruses* **11**, 1009.
- 534 16. Li, H., Zeng, R., Chen, Z., Liu, X., Cao, Z., Xie, Q., Yang, C., Lai, J. (2018). S-acylation of a  
535 geminivirus C4 protein is essential for regulating the CLAVATA pathway in symptom  
536 determination. *J. Exp. Bot.* **69**, 4459–4468.
- 537 17. Nagalakshmi, U., Wang, Z., Waern, K., Shou, C., Raha, D., Gerstein, M., Snyder, M. (2008). The  
538 transcriptional landscape of the yeast genome defined by RNA sequencing. *Science* **320**, 1344-1349.
- 539 18. Camarena, L., Bruno, V., Euskirchen, G., Poggio, S., Snyder, M. (2010). Molecular mechanisms of  
540 ethanol-induced pathogenesis revealed by RNA-sequencing. *PLoS Pathog.* **6**, e1000834.
- 541 19. Latham, J. R., Saunders, K., Pinner, M.S., Stanley, J. (1997). Induction of plant cell division by  
542 beet curly top virus gene C4. *Plant J.* **11**, 1273-1283.



- 543 20. Piroux, N., Saunders, K., Page, A., Stanley, J. (2007). Geminivirus pathogenicity protein C4  
544 interacts with *Arabidopsis thaliana* shaggy-related protein kinase AtSKeta, a component of the  
545 brassinosteroid signalling pathway. *Virology* **362**, 428-440.
- 546 21. Lai, J., Chen, H., Teng, K., Zhao, Q., Zhang, Z., Li, Y., Liang, L., Xia, R., Wu, Y., Guo, H., Xie, Q.  
547 (2009). RKP, a RING finger E3 ligase induced by BSCTV C4 protein, affects geminivirus infection  
548 by regulation of the plant cell cycle. *Plant J.* **57**, 905-917.
- 549 22. Macho, A.P., Lozano-Duran, R. (2019). Molecular dialogues between viruses and receptor-like  
550 kinases in plants. *Mol. Plant Pathol.* **20**, 1191–1195.
- 551 23. Rojas, M. R., Jiang, H., Salati, R., Xoconostle-Cázares, B., Sudarshana, M. R., Lucas, W. J.,  
552 Gilbertson, R. L. (2001). Functional analysis of proteins involved in movement of the monopartite  
553 begomovirus, tomato yellow leaf curl virus. *Virology* **291**, 110-125.
- 554 24. Tomas, D.M., Cañizares, M. C., Abad, J., Fernández-Muñoz, R., Moriones, E. (2011). Resistance to  
555 tomato yellow leaf curl virus accumulation in the tomato wild relative *Solanum habrochaites*  
556 associated with the C4 viral protein. *Mol. Plant-Microbe Interact.* **24**, 849-861.
- 557 25. Zeng, R., Liu, X., Yang, C., Lai, J. (2018). Geminivirus C4: Interplaying with Receptor-like  
558 Kinases. *Trends Plant Sci.* **23**, 1044–1046.
- 559 26. Carluccio, A. V., Prigigallo, M. I., Rosas-Diaz, T., Lozano-Duran, R., Stabolone, L. (2018). S-  
560 acylation mediates mungbean yellow mosaic virus AC4 localization to the plasma membrane and in  
561 turns gene silencing suppression. *PLoS Pathog.* **14**, 1–26.
- 562 27. Li, Z., Du, Z., Tang, Y., She, X., Wang, X., Zhu, Y., Yu, L., Lan, G., He, Z. (2020). C4, the  
563 pathogenic determinant of tomato leaf curl Guangdong virus, may suppress post-transcriptional  
564 gene silencing by interacting with BAM1 protein. *Front. Microbiol.* **11**, 851
- 565 28. Holmgren, A. (1988). Thioredoxin and glutaredoxin: small multi-functional redox proteins with  
566 active-site disulfide bonds". *Biochem. Soc. Trans.* **16**, 95-96.

- 567 29. Rouhier, N., Lemaire, S. D., Jacquot, J. P. (2008). The role of glutathione in photosynthetic  
568 organisms: emerging functions for glutaredoxins and glutathionylation. *Annu. Rev. Plant Biol.* **59**,  
569 143-166.
- 570 30. Xing, S. Rosso, M. G., Zachgo, S. (2005). ROXY1, a member of the plant glutaredoxin family, is  
571 required for petal development in *Arabidopsis thaliana*. *Development* **132**, 1555-1565.
- 572 31. Li, S., Lauri, A., Ziemann M., Busch, A., Bhave, M., Zachgo, S. (2009). Nuclear activity of  
573 ROXY1, a glutaredoxin interacting with TGA factors, is required for petal development in  
574 *Arabidopsis thaliana*. *Plant Cell* **21**, 429–441.
- 575 32. Patterson, K., Walters, L. A., Cooper, A. M., Olvera, J. G., Rosas, M. A., Rasmusson, A. G.,  
576 Escobar, M. A. (2016). Nitrate-Regulated Glutaredoxins Control Arabidopsis Primary Root  
577 Growth. *Plant Physiology* **170**, 989–999.
- 578 33. El-Kereamy, A., Bi, Y.-M., Mahmood, K., Ranathunge, K., Yaish, M. W., Nambara E., Rothstein,  
579 S. J. (2015). Overexpression of the CC-type glutaredoxin, OsGRX6 affects hormone and nitrogen  
580 status in rice plants. *Front. Plant Sci.* **6**, 934.
- 581 34. Liu, S., Fu, H., Jiang, J., Chen, Z., Gao, J., Shu, H., Zhang, S., Yang, C., Liu, J. (2019).  
582 Overexpression of a CPYC-Type Glutaredoxin, OsGrxC2.2, Causes Abnormal Embryos and an  
583 Increased Grain Weight in Rice. *Front. Plant Sci.* **10**, 848.
- 584 35. Zhao, H., Xia, Li., Ma, L. (2012). Basic helix-loop-helix transcription factors and epidermal cell  
585 fate determination in *Arabidopsis*. *Plant Signal Behav.* **7**, 1556-1560.
- 586 36. Zhang, L. Y., Bai, M. Y., Wu, J., Zhu, J. Y., Wang, H., Zhang, Z., Wang, W., Sun, Y., Zhao, J.,  
587 Sun, X., Yang, H., Xu, Y., Kim, S. H., Fujioka, S., Lin, WH., Chong, K., Lu, T., Wang, Z. Y.  
588 (2019). Antagonistic HLH/bHLH transcription factors mediate brassinosteroid regulation of cell  
589 elongation and plant development in rice and Arabidopsis. *Plant Cell* **21**, 3767-3780.

- 590 37. Ichihashi, Y., Horiguchi, G., Gleissberg, S., Tsukaya, H. (2010). The bHLH transcription factor  
591 SPATULA controls final leaf size in *Arabidopsis thaliana*. *Plant Cell Physiol.* **51**, 252-261.
- 592 38. Wang, Z., Cheng, K., Wan, L., Yan, L., Jiang, H., Liu, S., Lei, Y., Liao, B. (2015). Genome-wide  
593 analysis of the basic leucine zipper (bZIP) transcription factor gene family in six legume genomes.  
594 *BMC Genomics* **16**, 1053.
- 595 39. Uno, Y., Furihata, T., Abe, H., Yoshida, R., Shinozaki, K., Yamaguchi-Shinozaki, K. (2000).  
596 *Arabidopsis* basic leucine zipper transcription factors involved in an abscisic acid-dependent signal  
597 transduction pathway under drought and high-salinity conditions. *Proc. Natl Acad. Sci. U S A.* **97**,  
598 11632-11637.
- 599 40. Bou-Torrent, J., Salla-Martret, M., Brandt, R., Musielak, T., Palauqui, J.-C., Martínez-García, J.F.,  
600 Wenkel, F. (2012). ATHB4 and HAT3, two class II HD-ZIP transcription factors, control leaf  
601 development in *Arabidopsis*. *Plant Signal Behav.* **7**, 1382-1387.
- 602 41. Xie, Q., Frugis, G., Colgan, D., Chua, N-H. (2000). *Arabidopsis* NAC1 transduces auxin signal  
603 downstream of TIR1 to promote lateral root development. *Genes Dev.* **14**, 3024-3036.
- 604 42. Mallory, A. C., Dugas, D. V., Bartel, D., Bartel, B. (2020). MicroRNA regulation of NAC-domain  
605 targets is required for proper formation and separation of adjacent embryonic, vegetative, and floral  
606 organs. *Current Biology* **14**, 1035-1046.
- 607 43. Laufs, P., Peaucelle, A., Morin, H., Traas, J. (2004). MicroRNA regulation of the CUC genes is  
608 required for boundary size control in *Arabidopsis* meristems. *Development* **131**, 4311-4322.
- 609 44. Parenicová, L., de Folter, S., Kieffer, M., Horner, D. S., Favalli, C., Busscher, J., Cook, H. E.,  
610 Ingram, R. M., Kater, M. M., Davies, B., Angenent, G. C., Colombo, L. (2003). Molecular and  
611 phylogenetic analyses of the complete MADS-box transcription factor family in *Arabidopsis*: new  
612 openings to the MADS world. *Plant Cell* **15**, 1538-1551.

- 613 45. Grimplet, J., Martínez-Zapater, J. M., Carmona, M. J. (2016). Structural and functional annotation  
614 of the MADS-box transcription factor family in grapevine. *BMC Genomics* **17**, 80.
- 615 46. Shuai, B., Reynaga-Peña, C. G., Springer, P. S. (2002). The lateral organ boundaries gene defines a  
616 novel, plant-specific gene family. *Plant Physiol.* **129**, 747-761.
- 617 47. Ma, Y., Wang, F., Guo, J., Zhang, X. S. (2009). Rice OsAS2 gene, a member of LOB domain  
618 family, functions in the regulation of shoot differentiation and leaf development. *J. Plant Biol.* **52**,  
619 374-381.
- 620 48. Dubos, C., Stracke, R., Grotewold, E., Weisshaar, B., Martin, C., Lepiniec, L. (2010). MYB  
621 transcription factors in Arabidopsis. *Trends Plant Sci.* **15**, 573-581.
- 622 49. Ambawat, S., Sharma, P., Yadav, N. R., Yadav, R. C. (2013). MYB transcription factor genes as  
623 regulators for plant responses: an overview. *Physiol. Mol. Biol. Plants* **19**, 307-321.
- 624 50. Phukan, U. J., Jeena, G. S., Shukla, R. K. (2016). WRKY transcription factors: molecular  
625 regulation and stress responses in plants. *Front Plant Sci.* **7**, 760.
- 626 51. Jiang, J., Ma, S., Ye, N., Jiang, M., Cao, J., Zhang, J. (2017). WRKY transcription factors in plant  
627 responses to stress. *J. Integrative Plant Biol.* **59**, 86-101.
- 628 52. Narusaka, M., Shirasu, K., Noutoshi, Y., Kubo, Y., Shiraishi, T., Iwabuchi, M., Narusaka, Y.  
629 (2009). RRS1 and RPS4 provide a dual resistance-gene system against fungal and bacterial  
630 pathogens. *Plant J.* **60**, 218-226.
- 631 53. Khuong, T. T. H., Crete, P., Robaglia, C. Caffarri, S. (2013). Optimization of tomato Micro-tom  
632 regeneration and selection on glufosinate/Basta and dependency of gene silencing on transgenic  
633 copy number. *Plant Cell Rep.* **32**, 1441-1454.
- 634 54. Padmanabhan, C., Ma, Q., Shekasteband, R., Stewart, K. S., Hutton, S. F., Scott, J. W., Fei, Z.,  
635 Ling, K. S. (2019). Comprehensive transcriptome analysis and functional characterization of PR-5

- 636 for its involvement in tomato Sw-7 resistance to tomato spotted wilt tospovirus. *Scientific Reports*  
637 **9**, 7673.
- 638 55. Aranda, P. S., LaJoie, D. M., Jorcyk, C. L. (2012). Bleach gel: a simple agarose gel for analyzing  
639 RNA quality. *Electrophoresis*. **33**, 366–369.
- 640 56. Zhong, S., Joung, J.G., Zheng, Y., Chen, Y. R., Liu, B., Shao, Y., Xiang, J. Z., Fei, Z., Giovannoni,  
641 J. J. (2011). High-throughput Illumina strand-specific RNA sequencing library preparation. *Cold*  
642 *Spring Harb. Protoc.* **8**, 940-949.
- 643 57. Bolger, A. M., Lohse, M., Usadel, B. (2014). Trimmomatic: a flexible trimmer for Illumina  
644 sequence data. *Bioinformatics* **30**, 2114-2120.
- 645 58. Quast, C., Pruesse, E., Yilmaz, P., Gerken, J., Schweer, T., Yarza, P., Peplies, J., Glöckner, F. O.  
646 (2013). The SILVA ribosomal RNA gene database project: improved data processing and web-  
647 based tools. *Nucl. Acids Res.* **41**, D590-D596.
- 648 59. Langmead, B., Trapnell, C., Pop, M., Salzberg, S. L. (2009). Ultrafast and memory-efficient  
649 alignment of short DNA sequences to the human genome. *Genome Biol.* **10**, R25.
- 650 60. The Tomato Genome Consortium, 2012. The Tomato Genome Consortium, 2012.  
651 <https://www.nature.com/articles/nature11119/>
- 652 61. Kim, D., Langmead, B., Salzberg, S. L. (2015). HISAT: a fast spliced aligner with low memory  
653 requirements. *Nat. Methods* **12**, 357-360.
- 654 62. Anders, S., Huber, W. (2010). Differential expression analysis for sequence count data. *Genome*  
655 *Biol.* **11**, R106.
- 656 63. Du, Z., Zhou, X., Ling, Y., Zhang, Z., Su, Z. (2010). agriGO: a GO analysis toolkit for the  
657 agricultural community. *Nucleic Acids Res.* **38**, W64-W70.
- 658 64. Fei, Z., Joung, J. G., Tang, X., Zheng, Y., Huang, M., Lee, J. M., McQuinn, R., Tieman, D. M.,  
659 Alba, R., Klee, H. J., Giovannoni, J. J. (2011). Tomato functional genomics database: a

- 660 comprehensive resource and analysis package for tomato functional genomics. *Nucleic Acids*  
661 *Res.* **39**, D1156-D1163.
- 662 65. Zheng, Y., Jiao, C., Sun, H., Rosli, H. G., Pombo, M. A., Zhang, P., Banf, M., Dai, X., Martin, G.  
663 B., Giovannoni, J. J., Zhao, P. X., Rhee, S. Y., Fei, Z. (2016). iTAK: a program for genome-wide  
664 prediction and classification of plant transcription factors, transcriptional regulators, and protein  
665 kinases. *Molecular Plant* **9**, 1667-1670.
- 666 66. Altschul, S. F., Gish, W., Miller, W., Myers, E. W., Lipman, D. J. (1990). Basic local alignment  
667 search tool. *J Mol Biol.* **215**, 403-410.
- 668 67. Fernandez-Pozo, N., Menda, N., Edwards, J. D., Saha, S., Tecle, I. Y., Strickler, S. R., Bombarely,  
669 A., Fisher-York, T., Pujar, A., Foerster, H., Yan, A., Mueller, L. A. (2015). The Sol Genomics  
670 Network (SGN) from genotype to phenotype to breeding. *Nucleic Acids Res.* **43**, D1036-D1041.
- 671 68. R Core Team (2018). R: A language and environment for statistical computing. R Foundation for  
672 Statistical Computing, Vienna, Austria. URL <https://www.R-project.org/>.

673

674

## 675 **Supplementary Materials**

676

677 **Supplementary Table S1.** Reads summary for the RNA-Seq libraries.

678

679 **Supplementary Table S2.** Pearson correlation coefficient among replicate libraries indicate the  
680 reproducibility of RNA-seq libraries.

681

682 **Supplementary Figure S1.** Original gel pictures used for Figure 2.

683

684 **Supplementary dataset S1.** Differentially expressed genes (DEGs) between the TYLCV-*C4*  
685 transgenic line (C4-C1) and the control transgenic *Gfp* line (GFP1).

686

687 **Supplementary dataset S2.** Up-regulated differentially expressed genes (DEGs) between the  
688 TYLCV-*C4* transgenic line (C4-C1) and the control transgenic *Gfp* line (GFP1).

689

690 **Supplementary dataset S3.** Down-regulated differentially expressed genes (DEGs) between the  
691 TYLCV-*C4* transgenic line (C4-C1) and the control transgenic *Gfp* line (GFP1).

692

693 **Supplementary dataset S4.** Pathway analysis of differentially expressed genes (DEGs) between  
694 the TYLCV-*C4* transgenic line (C4-C1) and the control transgenic *Gfp* line (GFP1).

695

696 **Supplementary Dataset S5.** Quantitative RT-PCR validation of select differentially expressed  
697 genes and associated primers.

698

**A**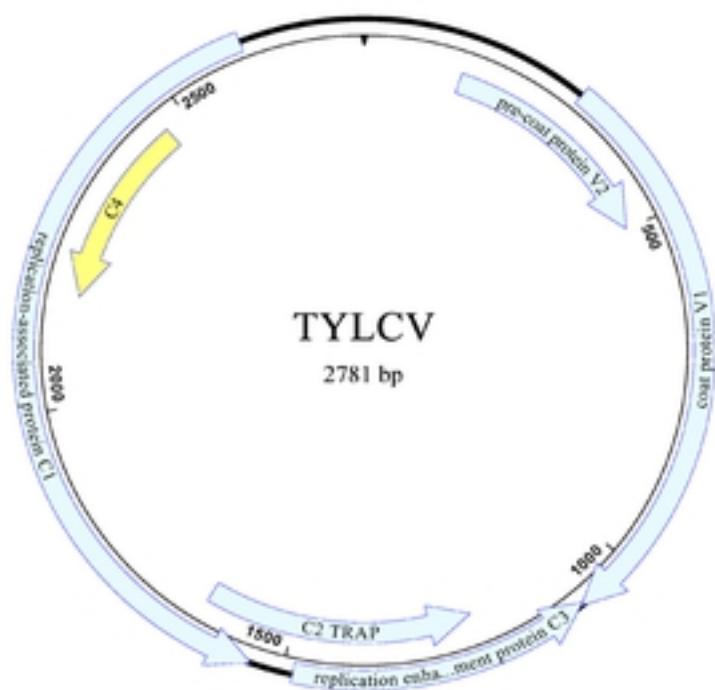**TYLCV-Virus Infection**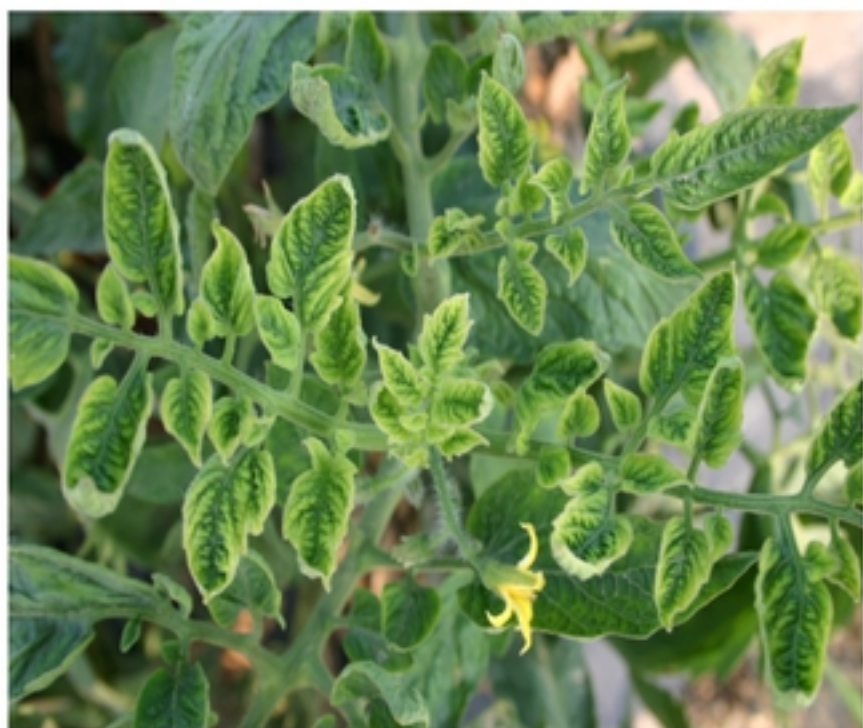**B**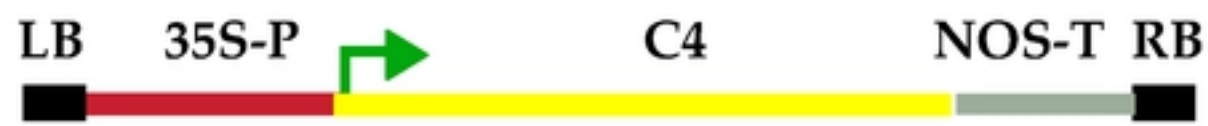**GFP****C4**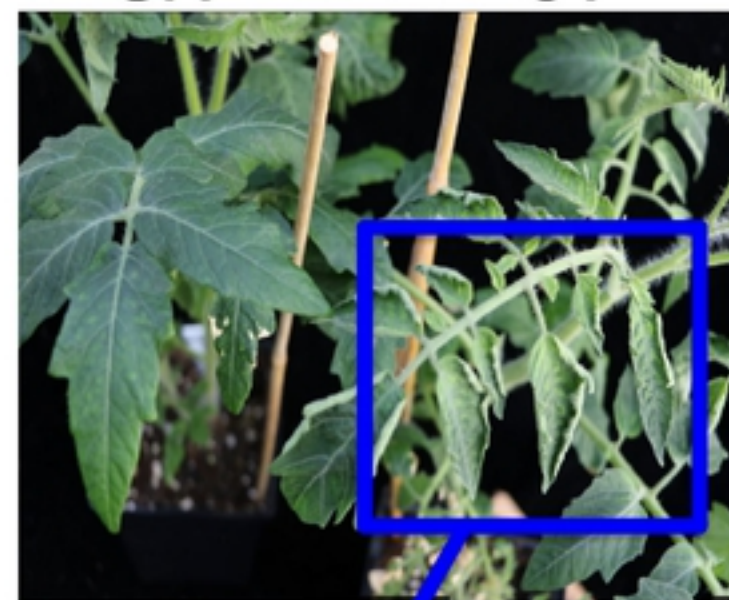**T<sub>0</sub>-Generation**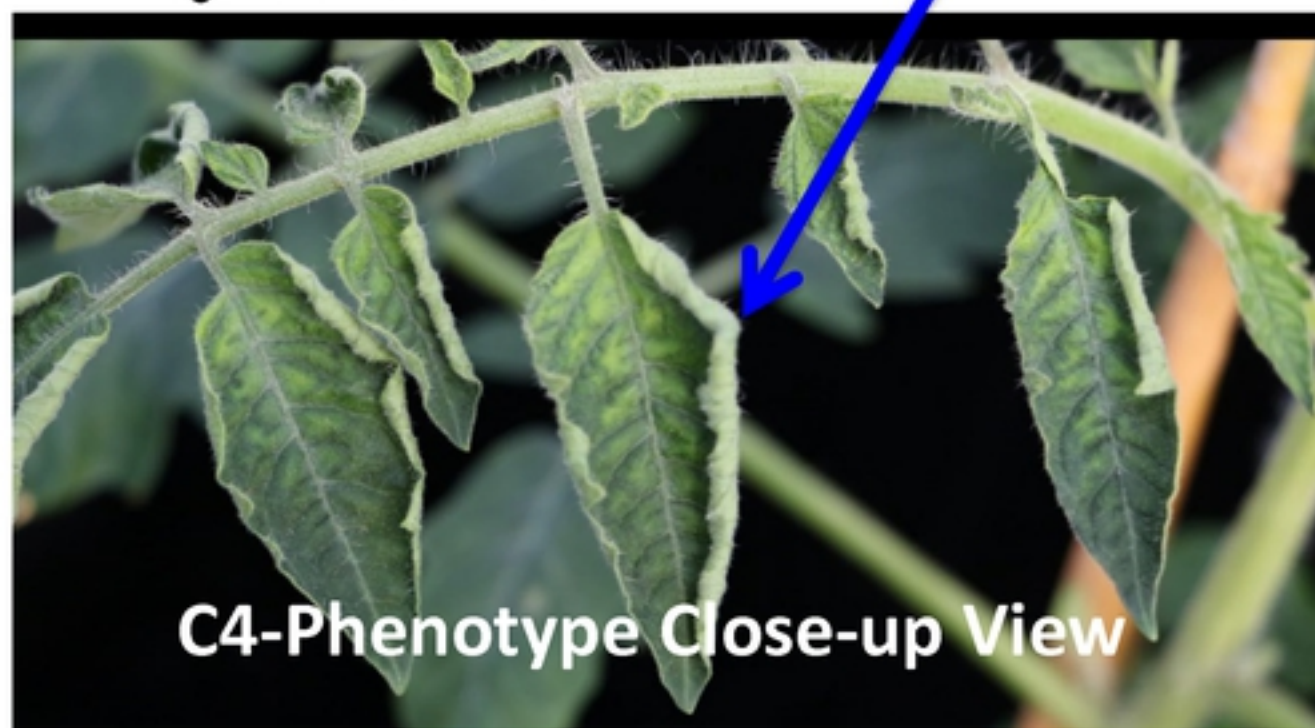**C4-Phenotype Close-up View**

Figure 1



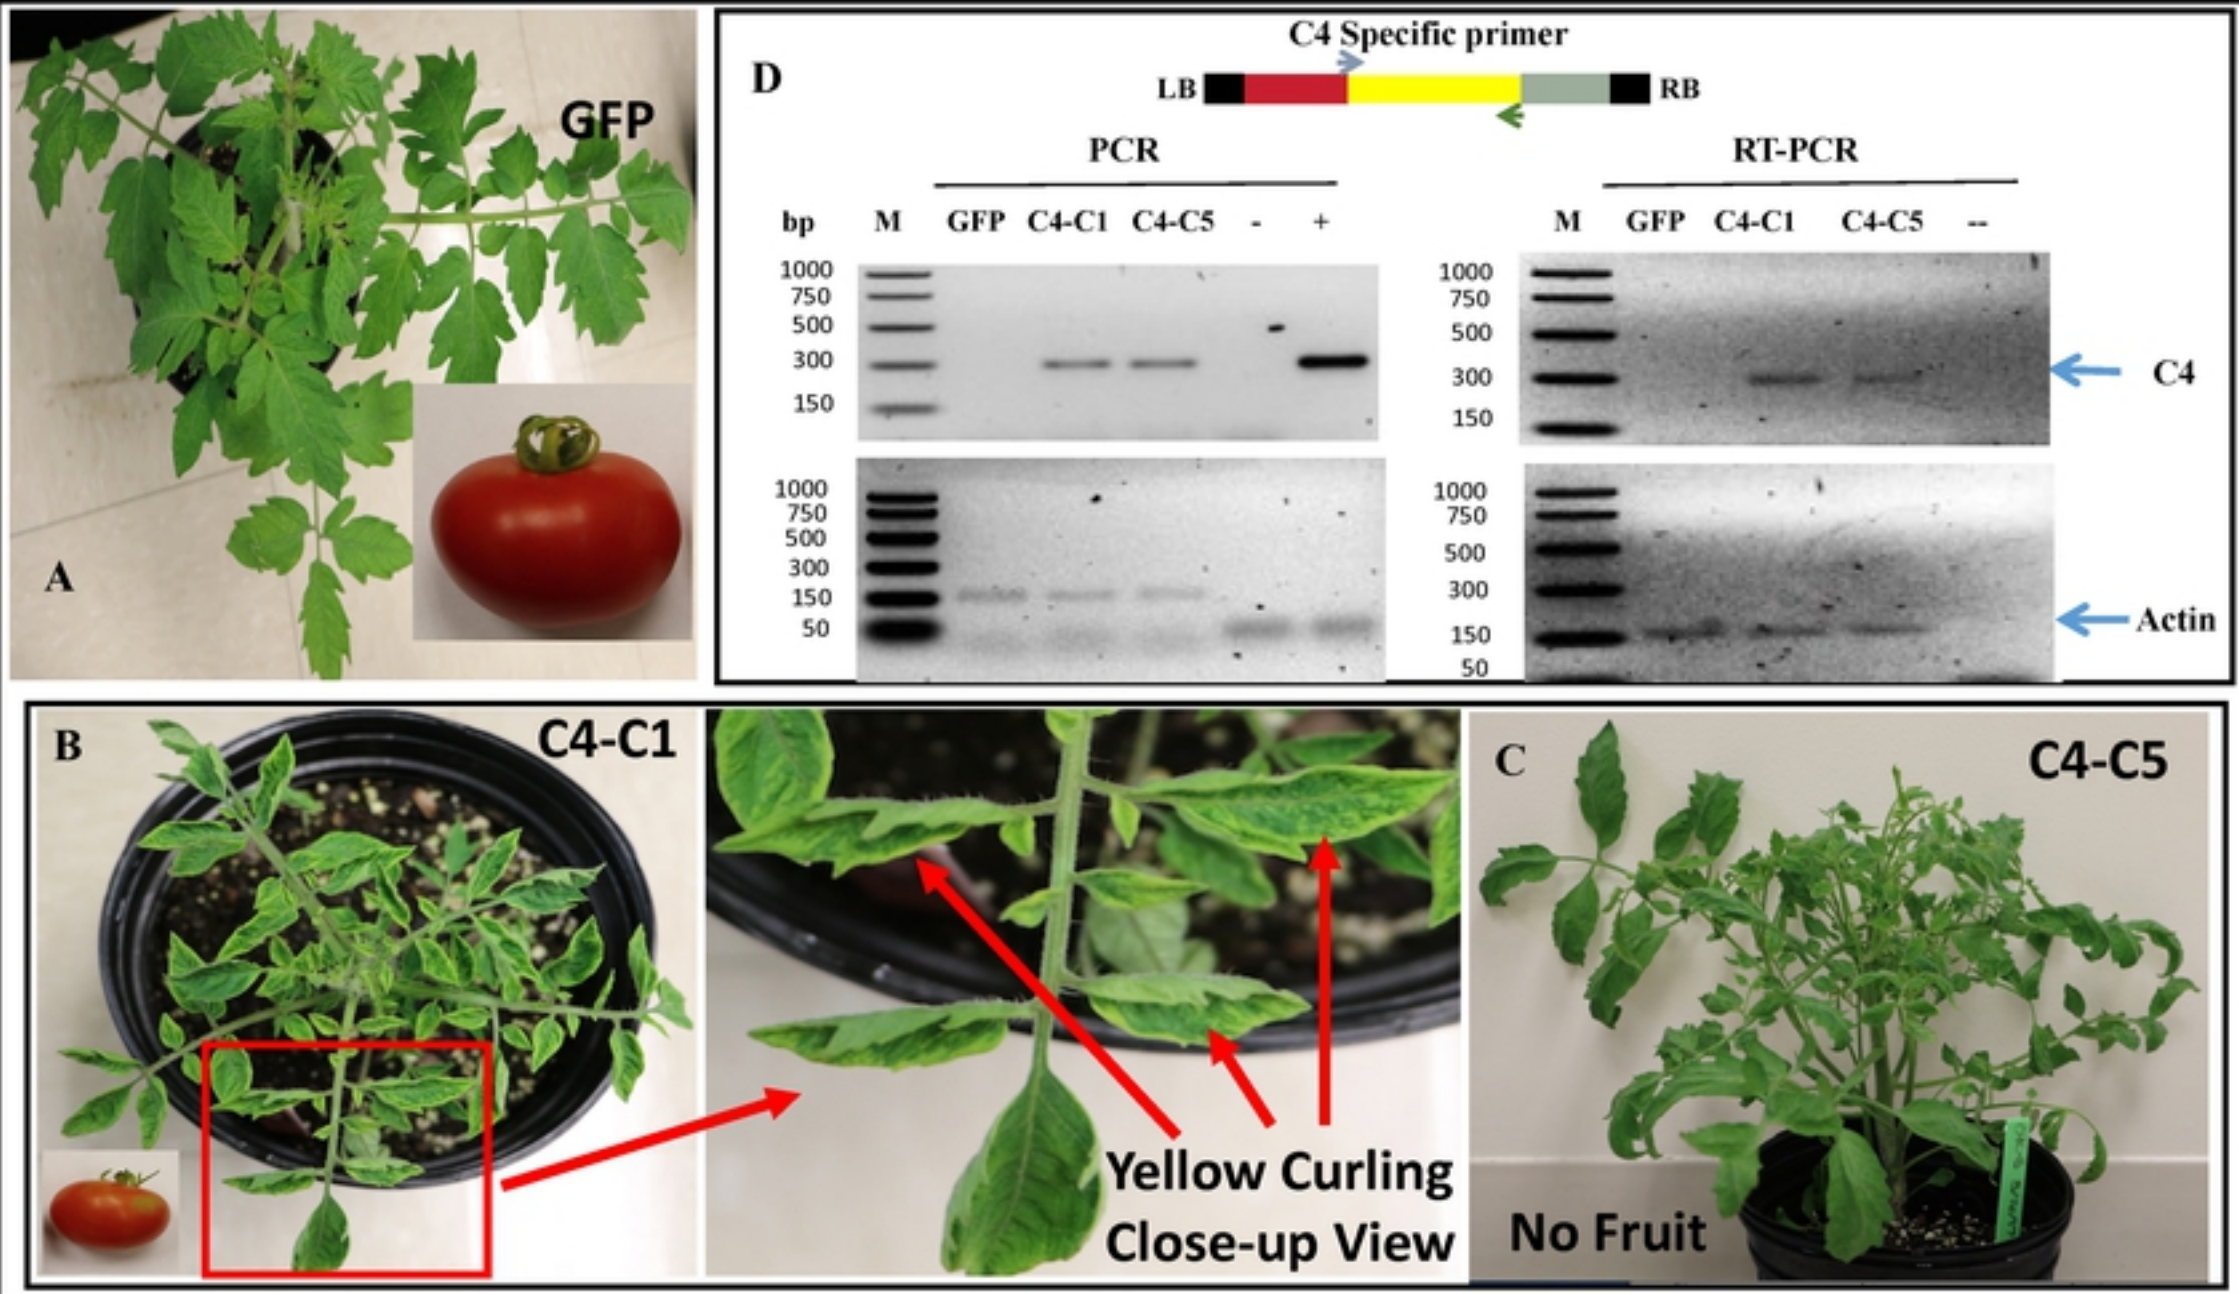

Figure

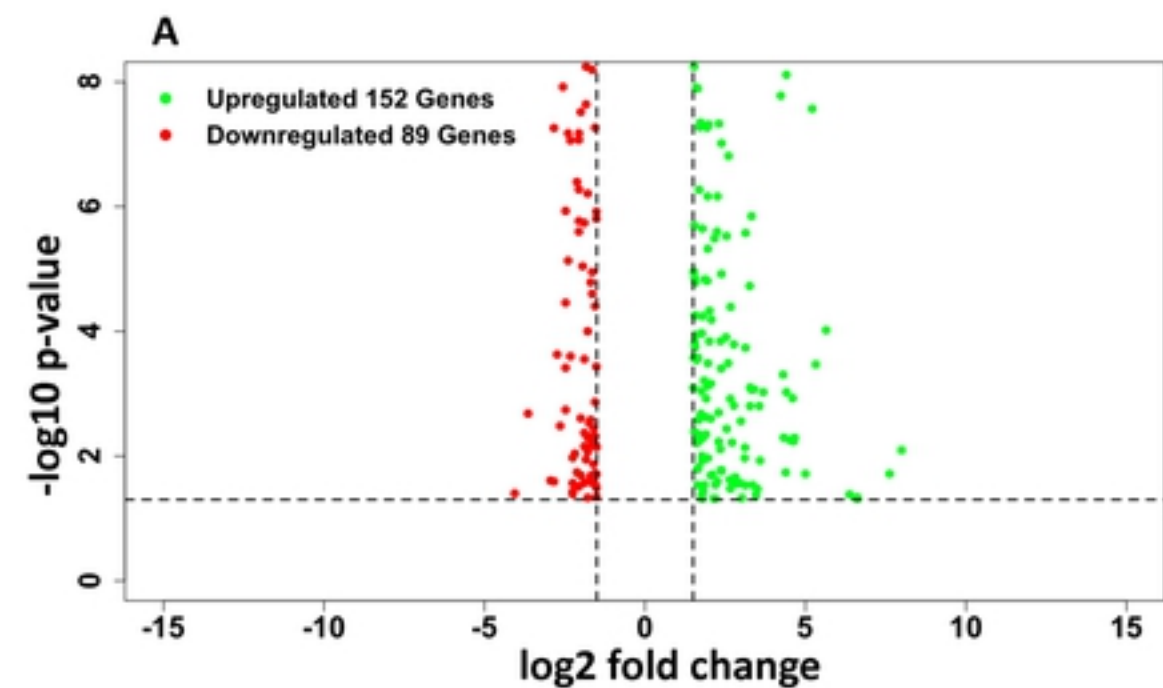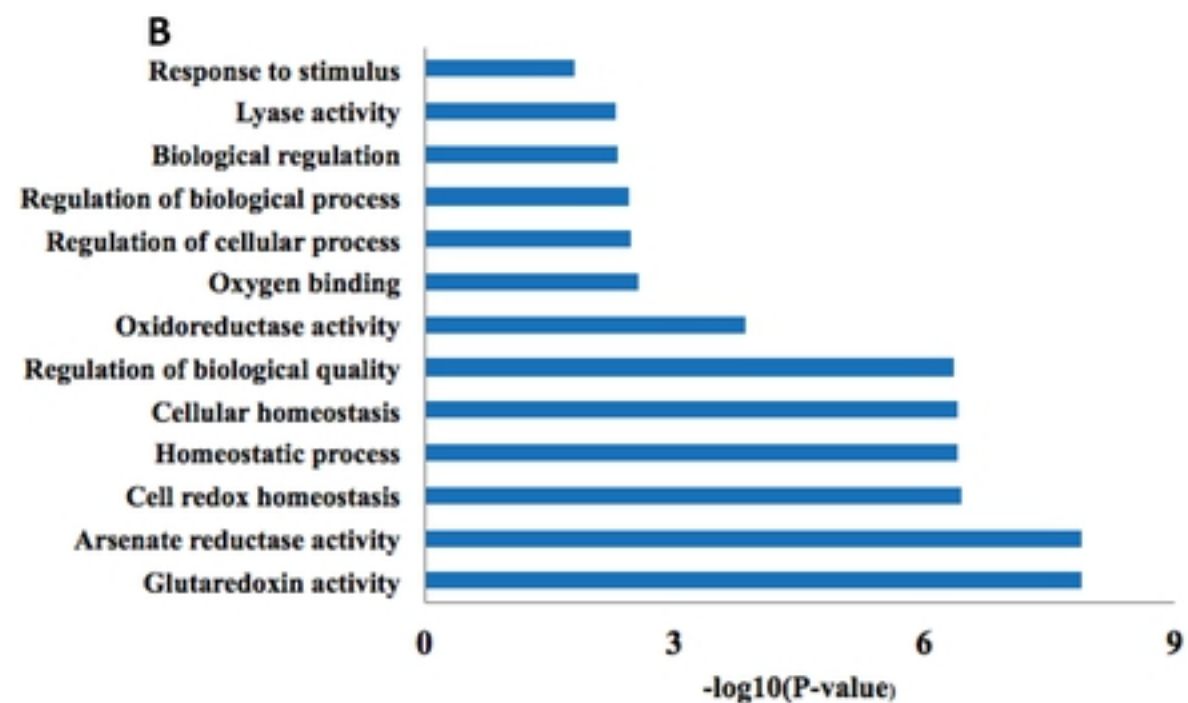

Figure

Wild type TYLCV encodes 6 genes

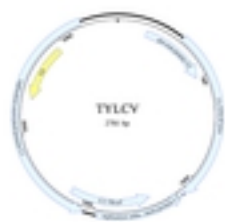

Whitefly vector transmission

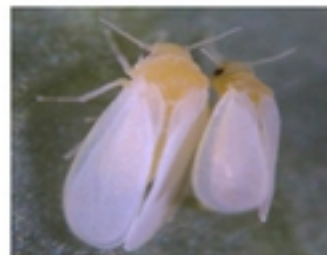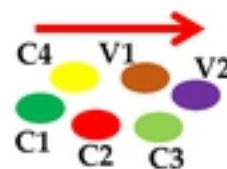

Tomato yellow leaf curl symptom

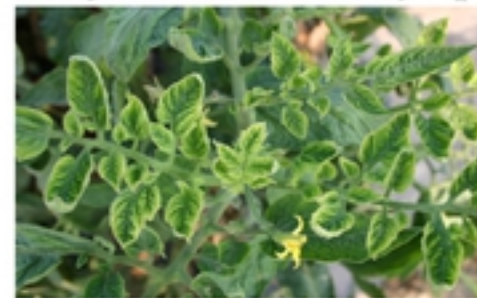

Single gene - C4

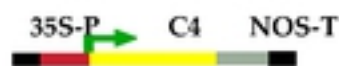

Agrobacterium-mediated transformation

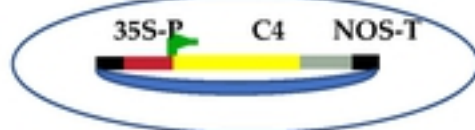

Tomato yellow leaf curl-like symptom

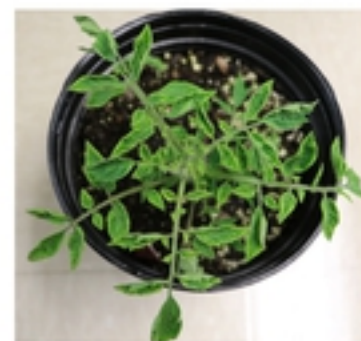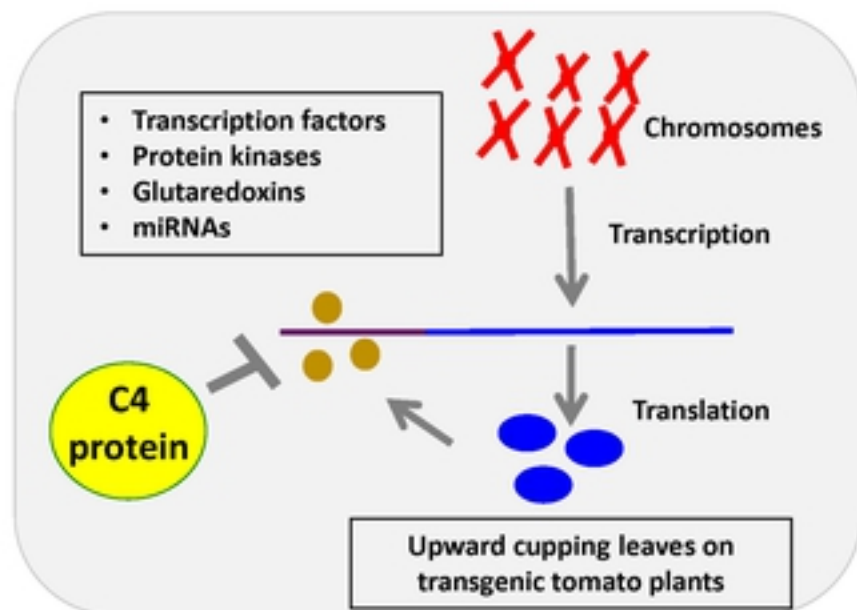

- RNAseq
- Bioinformatics
- Identified DEGs **mainly**
- Leaf developmental genes
- Validated by qRT-PCR

Illumina HiSeq 2500

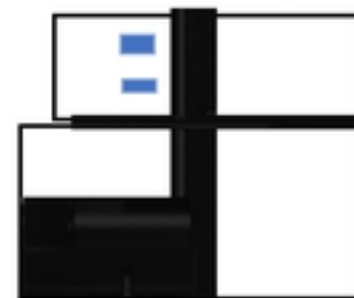

Figure
